# Supplementary material
Source: publisher figshare collection journal article supplement (https://gsajournals.figshare.com/ndownloader/files/29052276)
Supplement: Supplementary file 1 [file 29052276]

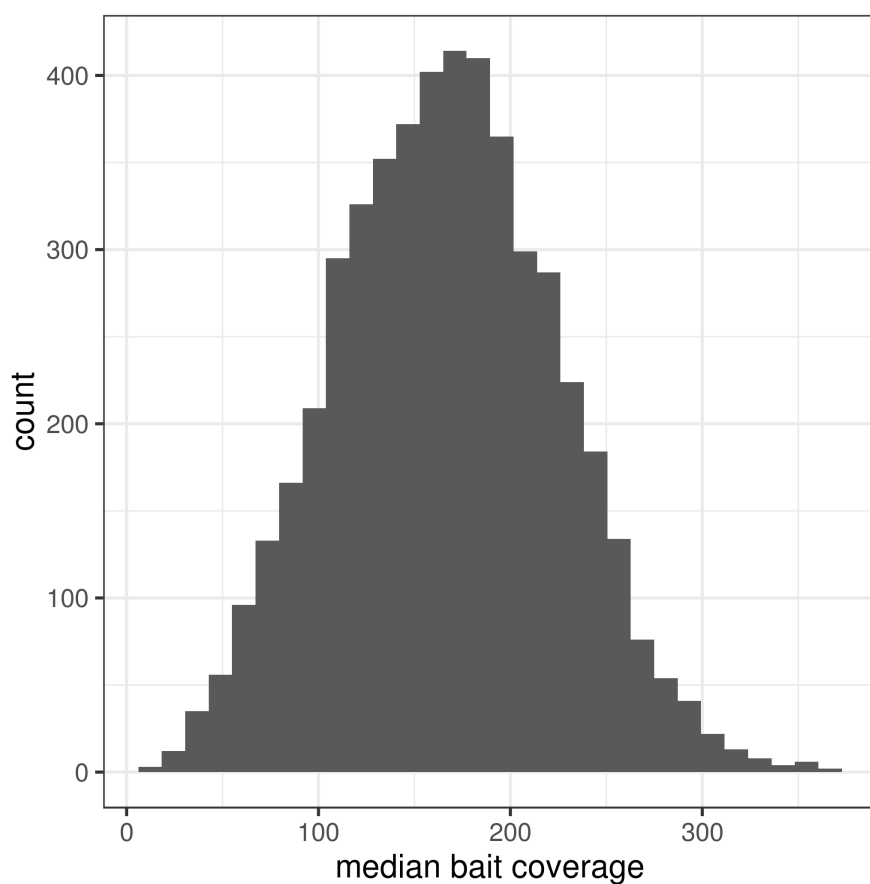

**Figure S4. Median bait coverage per locus.** F0, F1 and F2 samples were ordered by total read count and coverage data were computed for approximately every 5<sup>th</sup> sample in that list ( $n = 31$ ) and for the 250 bp bait region of each locus. Data per locus were then averaged.
